# A Global Metabolic Shift Is Linked to *Salmonella* Multicellular Development

Aaron P. White<sup>1‡a</sup>, Aalim M. Weljie<sup>2</sup>, Dmitry Apel<sup>1‡b</sup>, Ping Zhang<sup>2</sup>, Rustem Shaykhutdinov<sup>2</sup>, Hans J. Vogel<sup>2</sup>, Michael G. Surette<sup>1\*</sup>

**1** Department of Microbiology and Infectious Diseases, University of Calgary, Calgary, Canada, **2** Department of Biological Sciences, University of Calgary, Calgary, Canada

## Abstract

Bacteria can elaborate complex patterns of development that are dictated by temporally ordered patterns of gene expression, typically under the control of a master regulatory pathway. For some processes, such as biofilm development, regulators that initiate the process have been identified but subsequent phenotypic changes such as stress tolerance do not seem to be under the control of these same regulators. A hallmark feature of biofilms is growth within a self-produced extracellular matrix. In this study we used metabolomics to compare *Salmonella* cells in rdar colony biofilms to isogenic *csgD* deletion mutants that do not produce an extracellular matrix. The two populations show distinct metabolite profiles. Even though CsgD controls only extracellular matrix production, metabolite signatures associated with cellular adaptations associated with stress tolerances were present in the wild type but not the mutant cells. To further explore these differences we examine the temporal gene expression of genes implicated in biofilm development and stress adaptations. In wild type cells, genes involved in a metabolic shift to gluconeogenesis and various stress-resistance pathways exhibited an ordered expression profile timed with multicellular development even though they are not CsgD regulated. In *csgD* mutant cells, the ordered expression was lost. We conclude that the induction of these pathways results from production of, and growth within, a self produced matrix rather than elaboration of a defined genetic program. These results predict that common physiological properties of biofilms are induced independently of regulatory pathways that initiate biofilm formation.

**Citation:** White AP, Weljie AM, Apel D, Zhang P, Shaykhutdinov R, et al. (2010) A Global Metabolic Shift Is Linked to *Salmonella* Multicellular Development. PLoS ONE 5(7): e11814. doi:10.1371/journal.pone.0011814

**Editor:** Alfredo Herrera-Estrella, Cinvestav, Mexico

**Received:** March 2, 2010; **Accepted:** June 22, 2010; **Published:** July 27, 2010

**Copyright:** © 2010 White et al. This is an open-access article distributed under the terms of the Creative Commons Attribution License, which permits unrestricted use, distribution, and reproduction in any medium, provided the original author and source are credited.

**Funding:** This work was supported by grants from the Canadian Institutes of Health Research (<http://www.cihr-irsc.gc.ca>) to MGS and HJV. The funders had no role in study design, data collection and analysis, decision to publish, or preparation of the manuscript.

**Competing Interests:** The authors have declared that no competing interests exist.

\* E-mail: surette@ucalgary.ca

‡a Current address: Vaccine and Infectious Disease Organization, University of Saskatchewan, Saskatoon, Canada

‡b Current address: Department of Microbiology and Immunology, University of British Columbia, Vancouver, Canada

## Introduction

Bacteria frequently grow in multicellular communities that can exhibit complex phenotypes. How the cells organize and how these phenotypes are regulated is of fundamental importance in many areas of microbiology. Biofilms are examples of bacterial multicellular behavior. Biofilm is an umbrella term describing the growth of bacterial cells encased within an extracellular matrix usually in association with surfaces. Biofilms are thought to be the most prevalent form of bacterial life in nature and represent an evolutionarily conserved strategy for survival and persistence [1]. In addition, they are implicated in >60% of human infectious diseases with tremendous health and economic impacts [2]. Characteristics of biofilms include high cell densities, nutrient limitation, and matrix components that serve to link individual cells together [3]. Cells within a biofilm also display remarkable stress tolerance including reduced susceptibility to antibiotics. Many factors contribute to this elevated resistance including regulatory mechanisms [4,5] and physical and chemical protection by protein, polysaccharide or nucleic acid polymers in the extracellular matrix [1]. These polymers can also aid survival by nutrient trapping, buffering and water retention [6]. The stress tolerance of biofilms is a common feature independent of how they

are formed. However, it remains to be answered how biofilms grown under different conditions show common phenotypes without a coordinating regulatory pathway.

For *Salmonella*, the best characterized biofilm state is a coordinated multicellular behaviour termed the rdar morphotype [7,8]. The formation of rdar (red, dry and rough) colonies is marked by a shift from smooth to an aggregative morphology which results from the ordered production of extracellular matrix components [9]. The matrix in rdar morphotype colonies is primarily comprised of curli fimbriae (also called thin aggregative fimbriae or Tafi) and several exopolysaccharides (EPS), including cellulose and an O-antigen capsule [10,11,12]. These polymers are produced in response to starvation [13], triggered through activation of  $\sigma^S$  (RpoS), the sigma factor that regulates the general stress response [14,15], and ultimately CsgD, the main transcriptional regulator of the rdar morphotype [8,12]. CsgD activation is controlled by a complex regulatory cascade leading to increased intracellular levels of bis (3'-5') cyclic dimeric guanosine monophosphate (c-di-GMP) [16,17,18]. CsgD controls aggregation by directly stimulating transcription of *csgBAC*, encoding the curli structural proteins, and *adrA*, encoding a diguanylate cyclase that activates cellulose production [12,13]. The rdar morphotype polymers provide a survival advantage through enhanced

resistance to desiccation and disinfection [9,19,20], allowing cells to survive for up to several years [21]. The rdar morphotype is hypothesized to represent a critical state in the transmission of *Salmonella* between hosts [13,22].

Microarrays [23,24,25], mutagenesis [26,27] and proteomics [28,29], along with many other approaches, have been successfully used to identify differences between planktonic and biofilm cells. While each approach has its own merit, there is still much to learn about biofilm-specific regulatory networks [30] and stress resistance mechanisms, which are predicted to be related to heterogeneity [31,32] and/or slow growth of cells [33]. Here, we used a combined approach of metabolomics and transcriptional analysis to compare extracellular matrix-embedded, wild-type *S. enterica* serovar Typhimurium (hereafter referred to as *S. Typhimurium*) to a matrix-deficient *csgD* deletion mutant. We wanted to determine if cells that lack the machinery for polymer production (due to altered regulation) would accumulate precursors and share similar metabolism as wild-type cells or whether there was a specific metabolic adaptation linked to the aggregation process. The use of luciferase reporters in transcriptional analysis allowed for temporal resolution during this early event in biofilm formation. Metabolic differentiation and stress-resistance pathways were activated in wild-type cells as part of a global transcriptional upshift coinciding with the time of aggregation. The dynamic temporal program and lack of expression in *csgD* mutant cells suggests that many of the adaptations in wild-type cells occurred in response to the microenvironment generated by aggregation. We hypothesize that growth within the self-produced matrix regulates a core set of “biofilm” traits independent of the macro environment. This could be an important step in understanding the regulation and physiology of cells in bacterial biofilms.

## Results

Characterization of the small molecule metabolites produced by bacteria represents a non-biased approach to investigate cellular activity. For our experiments, metabolites were extracted from *S. Typhimurium* wild-type and *csgD* mutant colonies grown for two or five days on 1% tryptone medium (T agar). Under these conditions, wild-type cells form aggregative, rdar morphotype colonies, whereas *csgD* deletion mutant cells form smooth colonies that lack EPS production (Figure 1; [8,9]). Despite the differences in colony diameter (Fig. 1), the starting CFU numbers were similar: Day 2 -  $2.80 \pm 0.48 \times 10^9$  for wild-type and  $1.77 \pm 0.27 \times 10^9$  for the *csgD* mutant ( $n = 10$ ,  $P = 2.8 \times 10^{-6}$ , two-tailed Student's paired *t*-Test); and Day 5 -  $3.23 \pm 0.44 \times 10^9$  for wild-type and  $3.12 \pm 0.39 \times 10^9$  for the *csgD* mutant ( $n = 8$ ,  $P = 0.61$ , two-tailed Student's paired *t*-Test).

GC-MS and  $^1\text{H}$  NMR metabolite profiles were initially compared by unsupervised principal component analysis [34], which confirmed that there were significant differences between strains, and the time of growth, with no sample outliers (data not shown). A final supervised model of the spectra was generated using orthogonal partial least square discriminate analysis (Figure 2). The explained variance in metabolite data ( $R^2$ ) and predictive ability ( $Q^2$ ) were high for both GC-MS ( $R^2 = 0.976$ ,  $Q^2 = 0.865$ ) and  $^1\text{H}$  NMR ( $R^2 = 0.912$ ,  $Q^2 = 0.741$ ) models. The GC-MS spectra were clearly divided into four groups corresponding to each strain after 2 or 5 days of growth, whereas the  $^1\text{H}$  NMR profiles displayed more batch variation and the groupings were not as distinct (Figure 2).

## Summary of metabolomic analysis

In total, 25 metabolites were detected at statistically different concentrations (Table 1). Many compounds detected at higher levels in wild-type colonies were the end products of gluconeogenesis,

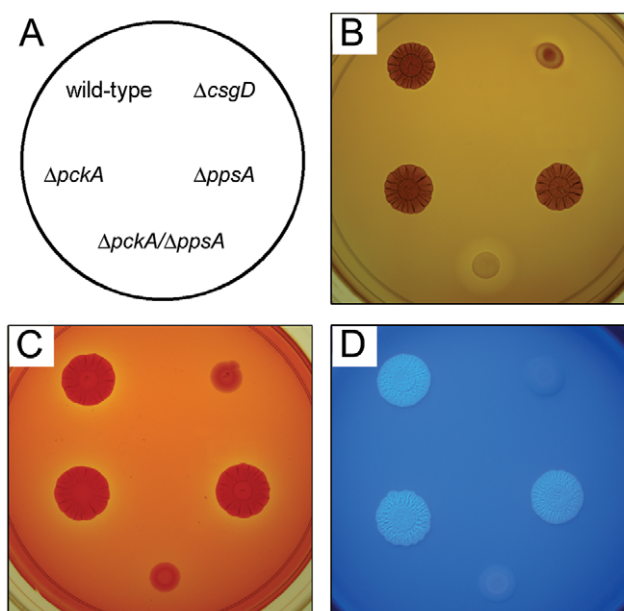

**Figure 1. Phenotypic comparison between aggregative and non-aggregative *S. Typhimurium* strains.** 1  $\mu\text{L}$  of cells from overnight cultures of each strain (A) were grown at 28°C for 50 h on T agar (B), 100 h on T agar supplemented with 100  $\mu\text{g}/\text{mL}$  Congo red (C), or 75 h on T agar supplemented with 200  $\mu\text{g}/\text{mL}$  calcofluor (D). Colonies in (B) were stained for glycogen production (see Materials and Methods); a dark brown color is indicative of the presence of glycogen [79]. Colonies in (D) were visualized under UV light; the white color is indicative of calcofluor binding [11].  $\Delta\text{csgD}$  and  $\Delta\text{pckA}/\Delta\text{ppsA}$  strains are deficient for rdar morphotype formation (A, C), glycogen (B) and cellulose (D) production.  
doi:10.1371/journal.pone.0011814.g001

including glucose and its polymer, glycogen, as well as galactose, mannose, and glycerol-3-phosphate, an important gluconeogenesis intermediate [35]. Trehalose, glycine-betaine (betaine) and glutamate, three of the major osmoprotectants used by *S. Typhimurium* [36], were found at higher concentrations in wild-type colonies. Additional osmoprotectants detected were carnitine and galactinol (Text S1). Other compounds more abundant in wild-type colonies were glutathione, nicotinamide adenine dinucleotide ( $\text{NAD}^+$ ), octanoic acid and pyroglutamate (Text S1). The major compounds detected at higher levels in *csgD* mutant colonies were the upper TCA cycle intermediates succinate, fumarate and malate, the polyamine compounds putrescine and cadaverine, and adenosine monophosphate (AMP), adenine and proline.

Plotting these metabolites onto a simplified *S. Typhimurium* metabolic map (Figure 3) indicated that gluconeogenesis was specifically activated in wild-type cells and/or repressed in *csgD* mutant cells. We hypothesized that a block in gluconeogenesis in *csgD* mutant cells was responsible for the accumulation of TCA cycle intermediates and polyamine compounds. The detection of higher levels of AMP in *csgD* mutant colonies was consistent with this hypothesis, since AMP is a potent inhibitor of the gluconeogenesis-specific enzyme fructose biphosphatase (Fbp) [37]. The presence of numerous osmoprotectants in the wild-type cells was unexpected because T agar is a low osmolarity medium; osmoprotectants normally only accumulate during growth under high osmolarity conditions [36].

## Reporters for transcriptional analysis

Based on our working model of cellular states, promoter-luciferase transcriptional fusions were generated for genes at

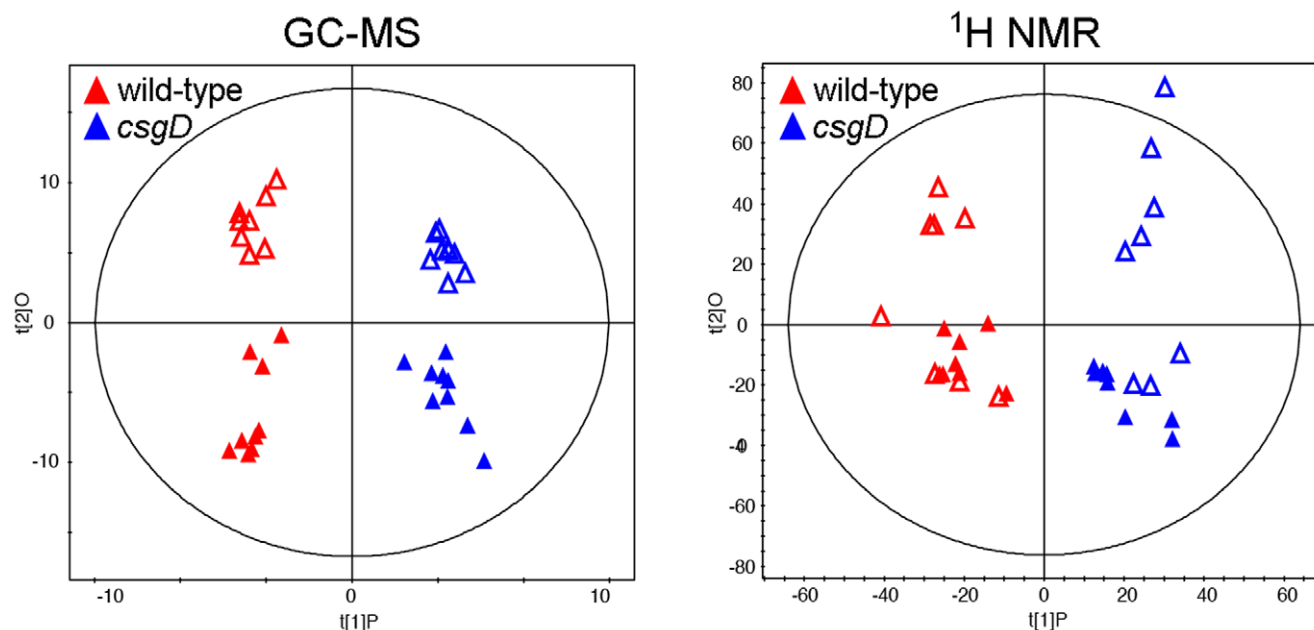

**Figure 2. Statistical analysis and modeling of GC-MS and  $^1\text{H}$  NMR metabolite profiles from wild-type *S. Typhimurium* and *csgD* mutant colonies.** GC-MS and  $^1\text{H}$  NMR profiles of metabolites extracted from wild-type or *csgD* mutant colonies grown on T agar for 2 days (open symbols) or 5 days (closed symbols) at  $28^\circ\text{C}$  were compared by orthogonal partial least square discriminate analysis (OPLS-DA). Score plots derived from the OPLS-DA models are shown. Each symbol represents one sample; for GC-MS,  $n=9$  for all groups except for wt at day 2 ( $n=8$ ), for  $^1\text{H}$  NMR,  $n=8$  for all four groups. The x-axis is the primary component, which represents all variance related to the *csgD* mutation. The y-axis is the first orthogonal component, which represents the variance related to the day of growth and is unrelated to mutation status.  
doi:10.1371/journal.pone.0011814.g002

regulatory checkpoints in several key metabolic pathways (Figure 3). In addition, reporters were generated for genes a) identified as important in related expression studies (J.S. Happe, R.J. Martinuzzi, V. Kostenko, M.G. Surette, unpublished) or b) whose protein products were identified by proteomic analysis of wild-type rdar morphotype colonies (A.P. White, W. Kim, M.G. Surette, unpublished). Control reporters that contain synthetic promoters designed to measure  $\sigma^{70}$  and  $\sigma^S$  activity - sig70\_7 [38] and sig38H4 [9], respectively - were also included. In total, reporters were generated for 59 single gene or multiple gene operons (Table S1).

Luciferase expression was initially monitored in wild-type and *csgD* mutant strains grown on T agar as individual or mixed-strain colonies (data not shown). However, the narrow linear range of detection by the camera system made it difficult to resolve differences in expression. Furthermore, while development of the rdar colony is an ordered process, it does not occur uniformly throughout the colony [9,39] making temporal expression profiling in the colony complicated. To overcome these problems, we analyzed gene expression during growth of the strains in 1% tryptone liquid media. Wild-type cells grown under these conditions have a clear aggregation phenotype, coupled with increased gene expression [9], and the multicellular aggregates formed share many of the characteristics of cells in rdar morphotype colonies [39,40]. In contrast, *csgD* deletion mutant cells do not aggregate under these same growth conditions [12,39].

### Transcriptional profiling reveals a global metabolic shift coinciding with aggregation

Most of the reporters in *S. Typhimurium* wild-type cells displayed a distinct temporal pattern of activation with peak expression occurring at the time of aggregation (Figure 4A). Aggregation was predicted to begin at 25 h, based on an increase

in  $\sigma^S$  activity and activation of essential rdar morphotype genes, including *csgDEFG*, *csgBAC* and *adrA* (Figure 5A). The coordinated activation of genes from many different functional categories (Table S1) is indicative of a global metabolic shift in wild-type cells. In contrast, the majority of operons analyzed, including the rdar morphotype genes (Figure 5A), had low expression in the *csgD* deletion mutant cultures (Figure 4B) and no correlation to the temporal pattern observed in wild-type cultures.

Global transcription rates were elevated at the time of aggregation. Wild-type cells had a two-fold increase in  $\sigma^{70}$  activity and nearly three-fold increase in  $\sigma^S$  activity relative to *csgD* mutant cells (Figure 4, Table S1). Since  $\sigma^{70}$  and  $\sigma^S$  compete for binding to the RNA polymerase holoenzyme and drive expression of genes required for vegetative growth and stress responses, respectively [14,15], these results were indicative of physiological differences between wild-type and *csgD* mutant cultures.

### Carbon flux into gluconeogenesis is increased in *S. Typhimurium* rdar morphotype cells

To monitor carbon flux, we analyzed the expression of genes encoding key enzymes in gluconeogenesis, glycolysis and TCA cycles (Figure 3). Four key gluconeogenesis-specific enzymes, malic enzyme (*maeB*), PEP synthase (*ppsA*), PEP carboxylase (*pckA*) and fructose biphosphatase (*fbp*) [35], were all significantly up-regulated in wild-type cultures relative to *csgD* mutant cultures (Figure 4, Figure 5B). The largest change in gene expression was measured for *pckA*, which was elevated 45-fold (Table S1). *GpmA*, *pgmI*, *gapA*, *fbaA*, and *fbaB* genes, encoding enzymes that catalyze reversible steps in gluconeogenesis and glycolysis, were also induced in the wild-type strain at the time of aggregation (Figure 4A, Figure 5C). We hypothesized that elevated expression of these enzymes was necessary for increased carbon flux between PEP and fructose-1,6-bisphosphate (Figure 3). Since upper TCA

**Table 1.** Metabolites with statistical difference in the wild-type *S. Typhimurium* and *csgD* mutant colonies.

| Compound <sup>a</sup>             | Concentration (μM) <sup>d</sup> |                    | Fold-increase <sup>e</sup> | P value <sup>f</sup> |
|-----------------------------------|---------------------------------|--------------------|----------------------------|----------------------|
|                                   | wild-type                       | <i>csgD</i> mutant |                            |                      |
| Higher in wt colonies             |                                 |                    |                            |                      |
| Glucose <sup>†</sup>              | 65.4±28.2                       | 9.47±2.35          | 6.9                        | 0.0063               |
| Trehalose <sup>‡,†</sup>          | 61.8±49.3                       | 10.1±7.4           | 6.1                        | 0.031                |
| Glutathione <sup>†</sup>          | 34.8±13.5                       | 9.02±6.09          | 3.9                        | 0.021                |
| Betaine <sup>†</sup>              | 11.0±5.5                        | 3.02±2.02          | 3.6                        | 0.012                |
| Acetamide <sup>†</sup>            | 23.2±14.3                       | 6.88±4.76          | 3.4                        | 0.037                |
| Glutamate <sup>†</sup>            | 280±133                         | 101±31             | 2.8                        | 0.034                |
| NAD <sup>++†</sup>                | 19.4±7.1                        | 8.47±2.08          | 2.3                        | 0.018                |
| Octanoic acid <sup>†</sup>        | 14.5±6.5                        | 6.22±2.02          | 2.3                        | 0.014                |
| Carnitine <sup>†</sup>            | 1.49±0.38                       | 0.63±0.58          | 2.4                        | 0.001                |
| Imidazole <sup>†</sup>            | 4.75±1.81                       | 2.73±0.85          | 1.7                        | 0.024                |
| Glycogen <sup>†,§,b</sup>         | +++                             | +                  | ND                         | ND                   |
| Methionine <sup>†</sup>           | +++                             | +                  | ND                         | ND                   |
| Glycerol-3-phosphate <sup>†</sup> | +++                             | +                  | ND                         | ND                   |
| Galactose <sup>†</sup>            | +++                             | +                  | ND                         | ND                   |
| Mannose <sup>†</sup>              | +++                             | +                  | ND                         | ND                   |
| Pyroglutamate <sup>†</sup>        | +++                             | +                  | ND                         | ND                   |
| Galactinol <sup>†,c</sup>         | +++                             | +                  | ND                         | ND                   |
| Higher in Δ <i>csgD</i> colonies  |                                 |                    |                            |                      |
| Succinate <sup>†</sup>            | 11.6±7.6                        | 56.2±25.6          | 4.8                        | 0.010                |
| Fumarate <sup>†,†</sup>           | 0.23±0.12                       | 0.68±0.34          | 3.0                        | 0.0066               |
| AMP <sup>†</sup>                  | 12.2±5.0                        | 30.8±12.2          | 2.5                        | 0.013                |
| Malate <sup>†</sup>               | +                               | +++                | ND                         | ND                   |
| Cadaverine <sup>†</sup>           | +                               | +++                | ND                         | ND                   |
| Putrescine <sup>†</sup>           | +                               | +++                | ND                         | ND                   |
| Proline <sup>†</sup>              | +                               | +++                | ND                         | ND                   |
| Adenine <sup>†</sup>              | +                               | +++                | ND                         | ND                   |

<sup>a</sup>Individual metabolites were identified by one-dimensional<sup>†</sup> or two-dimensional<sup>‡</sup> NMR or by GC-MS<sup>§</sup> as described in the Materials and Methods.

<sup>b</sup>Glycogen was identified at qualitatively higher levels in wild-type samples in 1D- and 2D-NMR spectrum but concentration values could not be determined.

<sup>c</sup>The common name for galactinol is 1-O-(α-D-galactopyranosyl)-myo-inositol.

<sup>d</sup>For <sup>1</sup>H NMR, concentrations (± standard deviation) were determined from pooled extracts of 20 colonies (10 extracts of 2 colonies; n=6), except for carnitine and fumarate where values are based on extracts from 2 colonies (n=6). For GC-MS, the compounds that are listed contributed the most to the variance in the OPLS-DA model (Figure 2).

<sup>e</sup>Fold-increase represents the concentration ratio of wild-type/*csgD* mutant for compounds higher in the wild-type colonies, and *csgD* mutant/wild-type for compounds higher in *csgD* mutant colonies.

<sup>f</sup>Statistical differences between wild-type and *csgD* mutant samples were calculated using two-tailed Student's T tests assuming equal variance.

doi:10.1371/journal.pone.0011814.t001

cycle intermediates are essential starting points for gluconeogenesis [41], we monitored the expression of succinate dehydrogenase (*sdhCD*), fumarate reductase (*fumAC*), and malate dehydrogenase (*mdh*); each of these enzymes were up-regulated in wild-type cultures coinciding with the time of aggregation (Figure 4A, Figure 5D). Lower expression of these genes in the *csgD* mutant cultures indicated that the elevated concentrations of TCA intermediates measured by metabolomics were not due to increased amounts of enzyme, but were more likely caused by

inhibition of gluconeogenesis. Expression of *aceBA*, coding for enzymes in the glyoxylate shunt, and *sucAB*, coding for enzymes catalyzing conversion of 2-ketoglutarate to succinate for complete TCA cycling, were not different between wild-type and *csgD* mutant strains (Figure 4, Figure 5D, Table S1). For the majority of metabolic reporters analyzed, expression profiles were similar in both strains until the estimated time of aggregation at which point expression was induced in wild-type cells (Figure 5B, C, D). This confirmed that there was a metabolic shift linked to the aggregation process.

The production of sugars from gluconeogenesis should be an essential pathway for aggregation in *S. Typhimurium*, particularly when strains are grown on amino-acid based media, such as tryptone or LB [42]. This was confirmed here since a *ppsA/pckA* mutant strain was unable to form rdar morphotype colonies and synthesize EPS or glycogen (Figure 1). However, strains carrying single deletions in *ppsA* or *pckA* were not impaired indicating that either arm of gluconeogenesis was sufficient to generate the precursor sugars required for polysaccharide production. Since gluconeogenesis is an energy consuming process that may be controlled by the adenylate energy charge [43], we also investigated the expression of adenylate kinase (*Adk*). *Adk* catalyzes the reversible conversion of ATP+AMP into two ADP molecules and is known to buffer ATP levels during periods of rapid ATP consumption [44]. *Adk* expression was elevated in wild-type cultures relative to *csgD* mutant cultures (Figure 4; Table S1), suggesting that aggregating cells have an increased requirement for ATP. Furthermore, since the *Adk* reaction is the only route of de novo synthesis of ADP from AMP in *Salmonella* [44] these results could explain the increased AMP levels detected in *csgD* mutant colonies.

### Enzymes for osmoprotectant synthesis and accumulation are up-regulated in *S. Typhimurium* rdar morphotype cells

*OtsBA*, coding for enzymes that catalyze trehalose biosynthesis [36], and *kdpFABC*, which encodes a high affinity potassium import system coupled to glutamate accumulation [36] were up-regulated in wild-type cultures at the time of aggregation (Figure 5E). Glycine betaine (betaine) or its precursor, choline, cannot be synthesized de novo by *Salmonella* [44] but can be transported into cells via the well-characterized *proP* and *proU* (*proVWX*) import systems [36]. Expression of *proP* was induced in the wild-type cultures (Figure 4), but *proVWX* was not (Table S1). Proline can also act as an osmoprotectant and be transported through the *proP* and *proU* systems [36], however, we could not explain the higher levels of proline in *csgD* mutant colonies based on these results. *yehZ**YXW*, encoding a putative osmoprotectant import system [45], and *osmE* and *osmY*, osmotically-inducible genes encoding proteins of unknown function [14], were highly induced in wild-type cultures timed with aggregation (Figure 4, Figure 5E, Table S1). This suggested that during the aggregation process, cells in wild-type cultures were exposed to an environment of increased osmolarity.

### Defences against reactive oxygen species (ROS) are induced in *S. Typhimurium* rdar morphotype cells

The tri-peptide glutathione (L-γ-glutamylcysteinylglycine; GSH) is a major reducing agent and acts as a detoxifying compound through non-enzymatic deactivation of ROS and the action of glutathione-S-transferase enzymes [46]. Expression of *gshA*, coding for the enzyme catalyzing the first step in GSH synthesis, was not elevated in the wild-type background (Table S1). However, *STM4267*, encoding a glutathione-S-transferase, and *yghA*, encod-

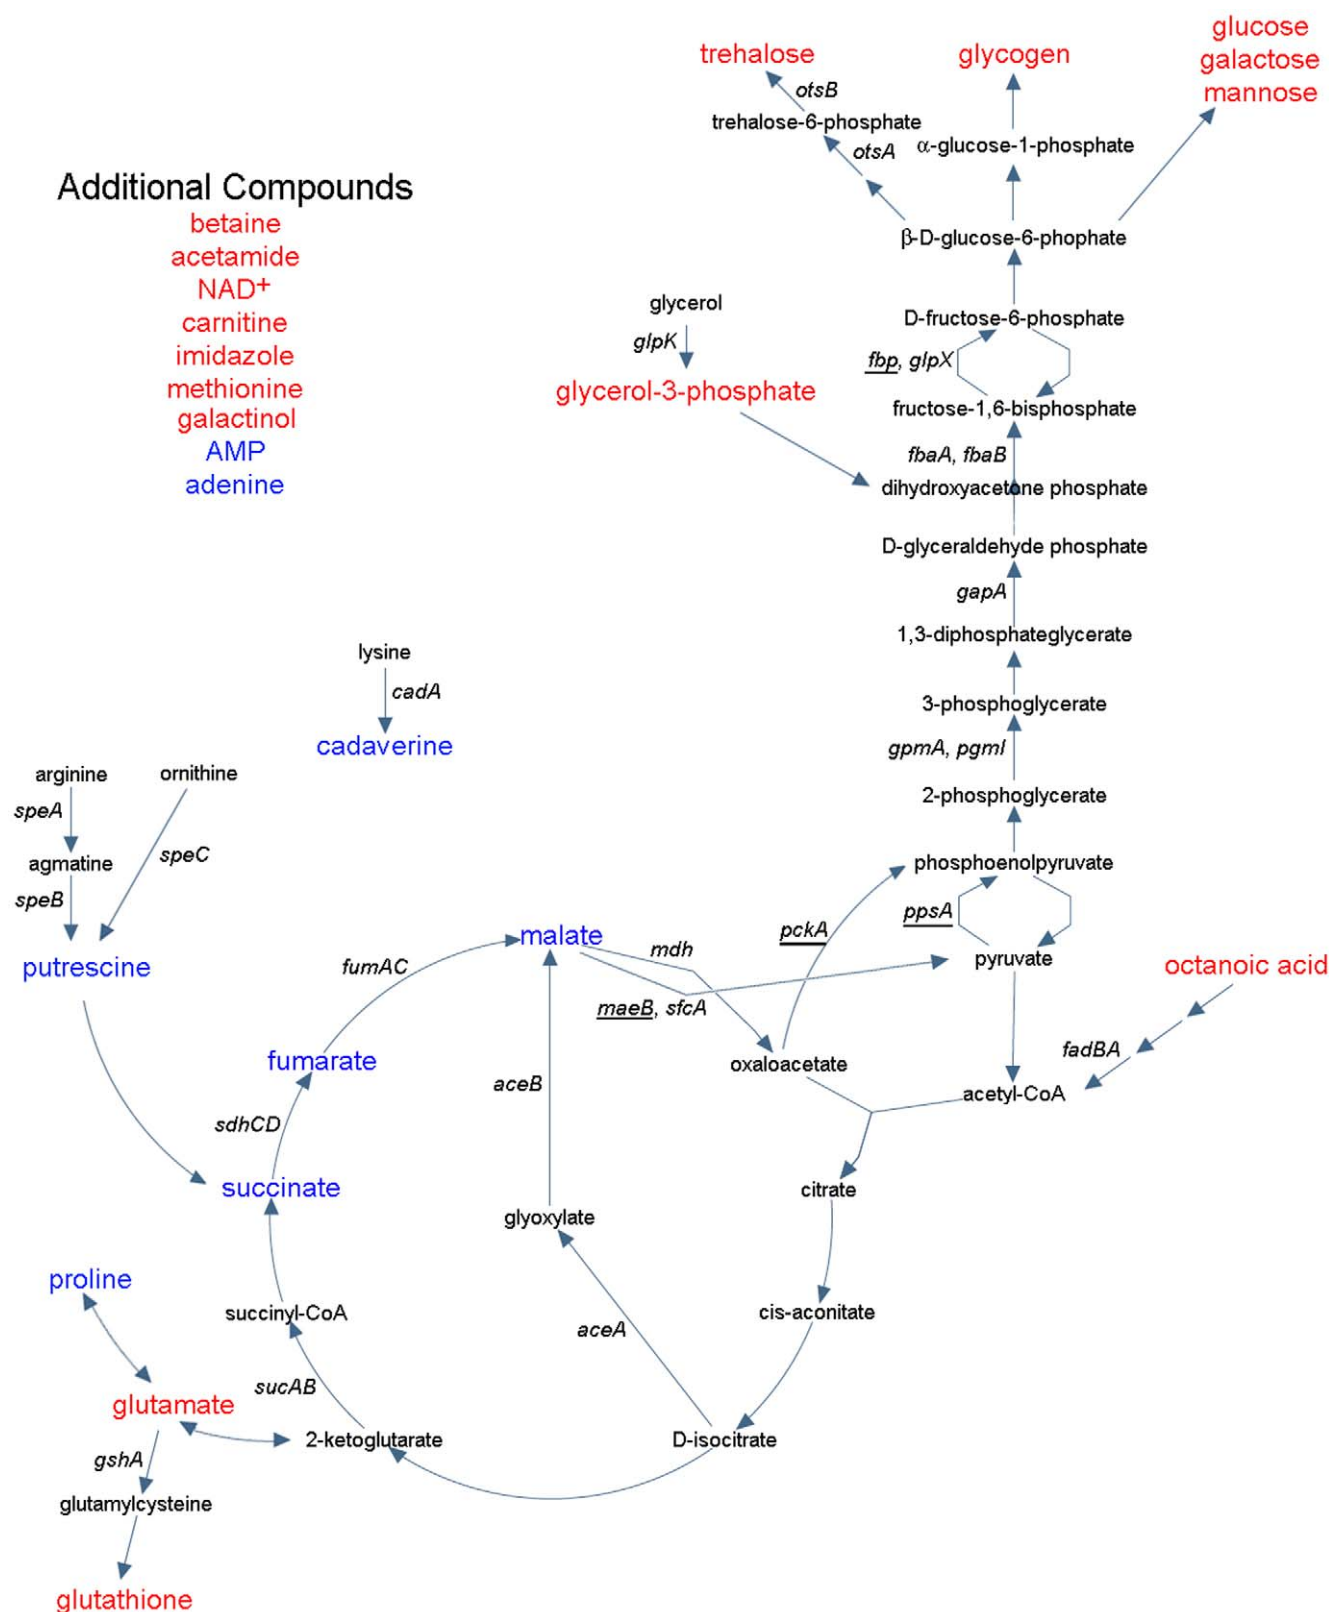

**Figure 3. Simplified *E. Typhimurium* metabolic map displaying the results of metabolomic analysis.** Compounds shown were identified at statistically higher concentrations in wild-type colonies (red) or *csgD* mutant colonies (blue). The schematics for gluconeogenesis, the TCA cycle, and related pathways were adapted from the EcoCYC™ database ([www.ecocyc.org](http://www.ecocyc.org)). Genes encoding important enzymes are listed in italics; their expression was monitored using promoter luciferase fusions. Genes encoding enzymes that catalyze key reactions in gluconeogenesis are underlined.

doi:10.1371/journal.pone.0011814.g003

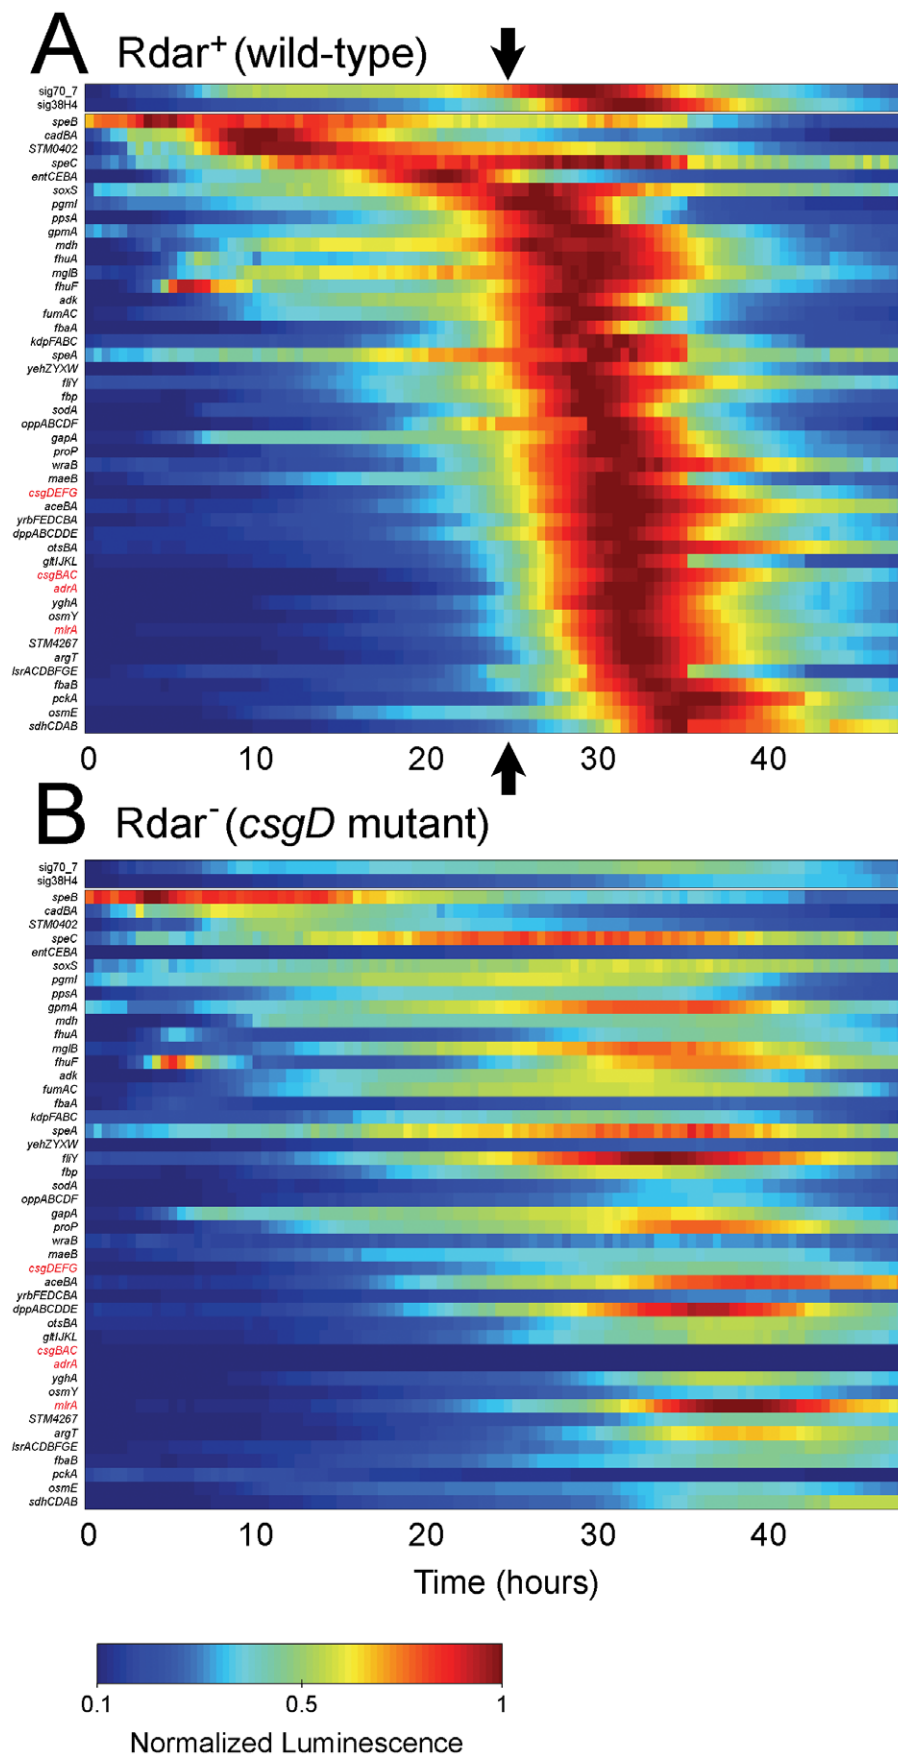

**Figure 4. Comparison of global gene expression in aggregative (wild-type) and non-aggregative (*csgD* mutant) *S. Typhimurium* cultures during growth at 28°C.** Each wild-type (A) or *csgD* mutant (B) reporter strain contains a plasmid-based promoter-luciferase (*luxCDABE*) fusion designed to measure gene expression by light production. For each reporter, shown is the ratio of *lux* activity at each time point divided by the maximum luminescence in the *wt* reporter strain. Blue and red indicate low and high expression, respectively. Gene (or operon) names are listed on the left of each panel; *sig38H4* and *sig70\_7* are synthetic reporters designed to measure  $\sigma^S$  and  $\sigma^{70}$  activity, respectively. Genes that are essential for rdar morphotype formation are shown in red; *mlrA* encodes a transcriptional regulator required for *csgDEFG* expression [83]. Arrows in (A) signify the beginning of the aggregation process at 25 h.  
doi:10.1371/journal.pone.0011814.g004

ing a putative glutathionylspermidine synthase, were up-regulated in wild-type cells coinciding with aggregation (Figure 4, Table S1). Glutathionylspermidine, a conjugate of GSH and spermidine, can also function as a detoxifying compound [47]. Several oxidative stress-relieving enzymes, including cytosolic superoxide dismutase (SodA), a putative peroxidase (STM0402), and a NADH:quinone oxidoreductase (WrbA) [48] were identified as abundant by proteomic analysis of wild-type rdar morphotype colonies (data not shown). Each of these genes, along with *soxS* from the *soxRS* superoxide response regulon [49], were expressed at higher levels in wild-type cultures (Figure 4, Table S1). Increased *wraB*

expression in wild-type cells could explain the increased levels of oxidized NAD<sup>+</sup> detected by metabolomics.

### Expression levels of polyamine biosynthesis enzymes are similar in wild-type *S. Typhimurium* and *csgD* mutant strains

Polyamines have diverse roles within cells, including stabilization of phosphate charges on nucleic acids and other negatively charged polymers and scavenging of ROS [50]. We analyzed expression of *speA*, *speB*, *speC*, and *cadBA* genes encoding four of the

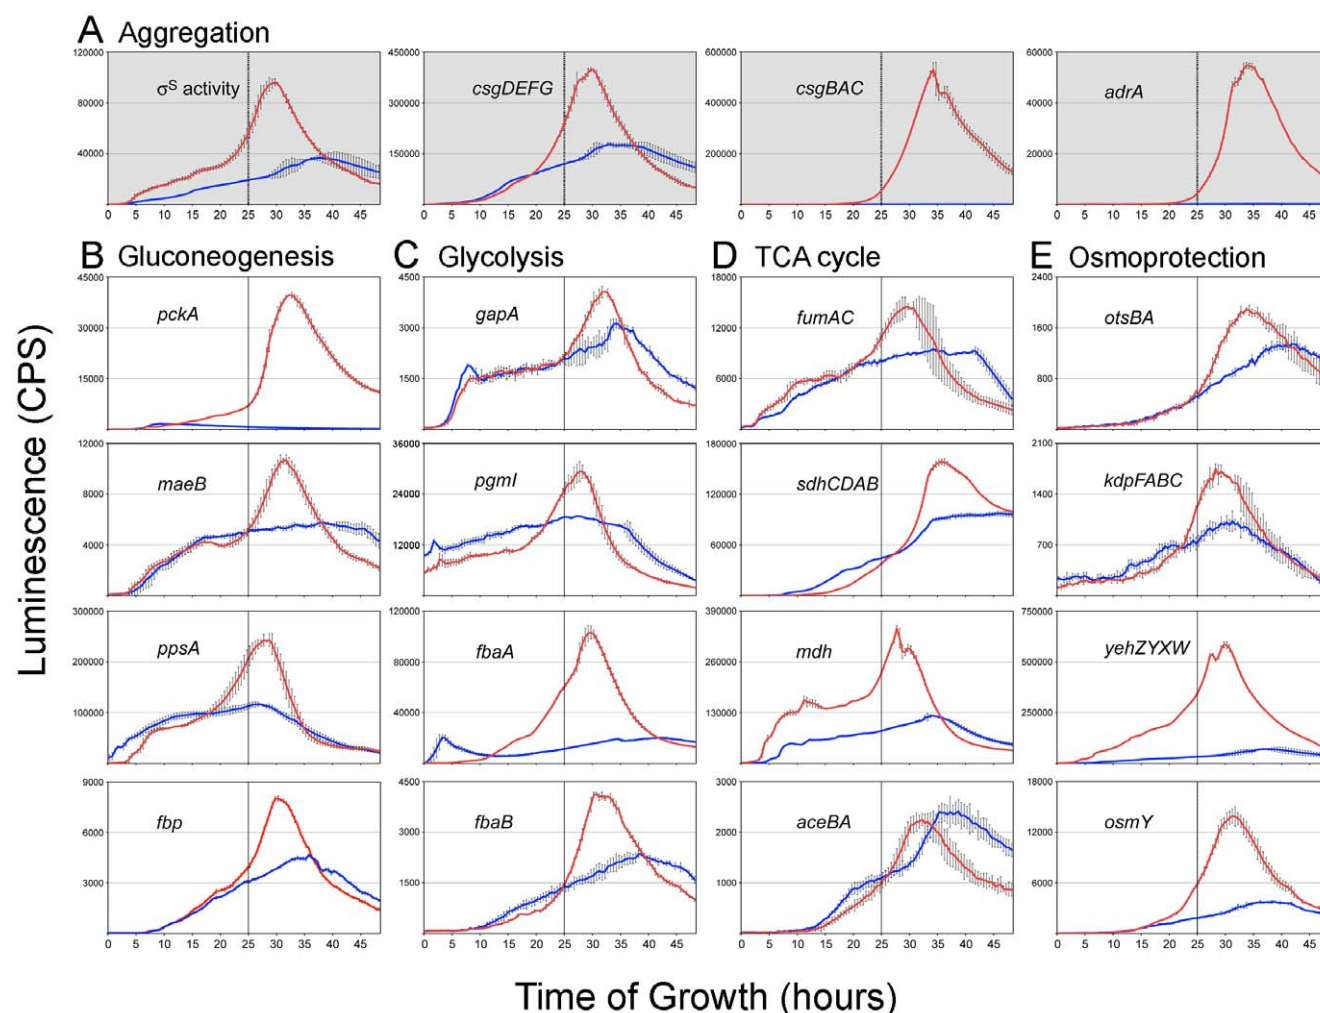

**Figure 5. Detailed comparison of gene expression in *wt* and  $\Delta csgD$  strains.** Each red (wild-type) or blue (*csgD* mutant) curve represents the raw, non-normalized gene expression value (light counts per second; CPS) in each strain as a function of time. Expression profiles are shown for operons encoding proteins essential for rdar morphotype aggregation (A), gluconeogenesis-specific enzymes (B), glycolytic or gluconeogenic bi-directional enzymes (C), upper tricarboxylic acid cycle enzymes (D), or proteins involved in osmoprotection (E). Gene (operon) names are listed on the upper left in each panel.  $\sigma^S$  activity is represented by expression measured from the *sig38H4* reporter. Vertical lines in each graph in (A) represent the beginning of the aggregation process at 25 h; these lines are shown for all other reporters to highlight the coordinated timing of gene expression. For the majority of genes, promoter activity peaks at or near the time of aggregation in wild-type cells.  
doi:10.1371/journal.pone.0011814.g005

main decarboxylation enzymes for production of putrescine and cadaverine (Figure 3). *speA*, *speB* and *speC* had similar magnitudes of expression in wild-type and *csgD* mutant cultures, whereas *cadBA* was slightly elevated in wild-type cultures (Figure 4, Table S1). These results fit our hypothesis that polyamines accumulated in *csgD* mutant cells as a result of reduced carbon flux into gluconeogenesis and other biosynthetic pathways.

### Levels of intracellular iron are limiting during growth in 1% tryptone

Iron limitation is known to activate *csgD* expression and formation of the rdar morphotype [8] and is also known to induce expression of different iron acquisition systems [51]. *EntCEBA*, encoding enzymes for the biosynthesis of enterobactin, *fhuA*, encoding an outer membrane receptor for ferrichrome siderophores produced by fungi, and *fhuF*, which encodes a protein involved in the ferrioxamine B system [52], were induced in both wild-type and *csgD* mutant cultures during growth (Figure 4), indicating that iron was limiting during growth. However, the *fhuA* and *entCEBA* operons were induced higher in wild-type cultures (Table S1), suggesting that aggregation may also affect intracellular iron levels.

### ABC transporters are up-regulated during growth in wild-type

In Gram-negative bacteria, many transporters from the ATP-binding cassette (ABC) superfamily function as nutrient importers that utilize high-affinity periplasmic-binding proteins (PBP) to define their specificity [53]. Several PBP, with specificities for carbohydrates, amino acids, peptides, or unknown substrates (Table S1), were identified as abundant by proteomic analysis of wild-type rdar morphotype colonies (data not shown). Expression of these operons, including *lscACDBFGE*, encoding the transport and processing system for the AI-2 signalling molecule [54], were induced in both strain backgrounds at later time points during growth when nutrient limitation would occur (Figure 4, data not shown). *Yrb*, *opp*, *lsr*, *glt* and *argT* operons were up-regulated in wild-type cultures coinciding with aggregation (Figure 4; Table S1). The induction of diverse nutrient import systems may be necessary for cells to harvest all available nutrients in the current growth media or could represent an example of carbon source foraging [55], where cells expend energy to broaden their search for alternative energy sources.

## Discussion

Starvation in non-differentiating bacteria is known to induce a myriad of molecular changes to allow for more efficient nutrient scavenging and increased stress resistance [56]. The results described indicate that the *Salmonella* rdar morphotype is a specialized multicellular physiology adapted to this survival response. This may be critical for *Salmonella* transmission by ensuring that enough cells survive to infect new hosts [9,13,21]. Analyzing the metabolome and identification of the major metabolites by NMR and GC-MS revealed that rdar morphotype cells have a shift in central metabolism to gluconeogenesis and production of small molecules that aid in osmotic stress response. These changes were observed at the transcriptional level as part of a global temporal shift that was timed with aggregation.

*S. Typhimurium* rdar morphotype cells displayed increased carbon flux into gluconeogenesis at the onset of aggregation. In particular, PEP synthase and PEP carboxylase enzymes were required to synthesize sugars for production of EPS and glycogen. This result was undoubtedly influenced by growth on amino-acid based media, however, the significant up-regulation of gluconeogenesis

in aggregation-positive wild-type cells compared to aggregation-negative *csgD* mutant cells was striking. This observation has implications for many types of natural biofilms and is likely not restricted to *Salmonella*. Polysaccharides are usually essential for aggregation to occur [6,11], such as with alginate, Pel and Psl polysaccharides in *Pseudomonas aeruginosa* [57], and VPS in *Vibrio cholerae* [58]. Glycogen is also important because it is known to enhance *S. enterica* survival [59] and was recently shown to play a critical role in transmission of *V. cholerae* [60]. Under the conditions investigated, it is assumed that carbon flux is controlled by the catabolite repressor/activator (Cra) protein, which activates gluconeogenesis enzymes (*ppsA*, *pckA*, *fbp*) and represses sugar catabolism enzymes [61]. In agreement with this hypothesis, the addition of glucose during growth leads to inhibition of the rdar morphotype (A.P. White and M.G. Surette, unpublished). Collectively, these results suggest that blocking gluconeogenesis may be an effective means to prevent or reduce biofilm formation in a wide variety of bacteria.

*S. Typhimurium* rdar morphotype cells displayed numerous stress-resistance adaptations that coincided with aggregation. Several osmoprotectants were detected at high levels in rdar morphotype colonies and transcriptional analysis verified that systems for osmoprotectant synthesis and transport were induced. Osmoprotectants are predicted to enhance desiccation survival by causing a reduction in water stress [62]. We also observed that wild-type cells had an increased capacity for ROS defence, which would partially alleviate the damage caused to DNA, lipids and proteins known to occur during desiccation [62]. Finally, the induction of nutrient acquisition systems as part of a carbon foraging or starvation response [55,56] would ensure swift revival of cells after long periods of “metabolic dormancy”. Our results agree with a recent study by Hinton and colleagues [63] who investigated *S. Typhimurium* biofilms using proteomic and microarray analysis. Similar stress-resistance adaptations have also been observed in other biofilm systems, including evidence for increased osmoprotection in *E. coli* [27] and ROS defence in *P. aeruginosa* [28]. Each of these main stress adaptations are known to be controlled by  $\sigma^S$  [14,15,55,56], and  $\sigma^S$  activity was measured to be almost three times higher in *S. Typhimurium* wild-type cells compared to *csgD* mutant cells. In *E. coli*, which shares most features of rdar morphotype regulation [17], CsgD was shown to have a stabilizing effect on  $\sigma^S$  protein levels [64] which could partially explain our findings. The only other metabolome comparison of biofilm and planktonic cells was performed with *P. aeruginosa*, and although these cell types had different metabolic profiles, individual metabolites were not identified [65].

One of the most intriguing questions arising from this study is how is the signal for *Salmonella* aggregation linked to metabolism and stress resistance? The transcriptional regulator CsgD is the most obvious candidate, acting in concert with  $\sigma^S$  [63,64]. However, analysis of the CsgD regulon in *E. coli*, did not reveal any gene targets linked to global carbon flux and relatively few that were directly linked to stress resistance [66]. Based on these findings, we hypothesize that the primary role of CsgD is to control the aggregation process and that the majority of adaptations are the consequence of production of an extracellular matrix. Stress-inducing changes in the microenvironment of aggregated or biofilm cells have been observed before. In *P. aeruginosa*, the chelation of ions by extracellular DNA present in the biofilm caused activation of antibiotic and stress resistance pathways in the adjacent cells [5]. It is possible that synthesis of an extracellular matrix by rdar morphotype cells causes an increase in the local osmolarity around aggregated cells [6] or mimics an increase in osmolarity by reducing the water activity,

which, in turn, would expose cells to increased oxidative stress [62]. The signal for *S. Typhimurium* cells to aggregate and the accompanying changes may be akin to a developmental process, such as sporulation in *Myxococcus* and *Bacillus* spp. [67,68]. Another possibility is that the rdar morphotype adaptations are genetically programmed changes that occur prior to experiencing the environmental stress (anticipatory regulation [69]).

c-di-GMP is a key regulatory molecule in the aggregation process. High intracellular levels have been linked to aggregation in numerous bacterial species, including *Salmonella*, *E. coli*, *Pseudomonas* spp. and *Vibrio* spp. [3,70]. In *Salmonella* and *E. coli*, there is a complex interplay between c-di-GMP, CsgD,  $\sigma^S$ , and other global regulators, such as CsrA (Text S1) [16,17,71]. Although we didn't attempt to dissect this regulatory network, both curli production (via activation of *csgD*) and cellulose production (via activation of *adrA*) are indicators of high intracellular levels of c-di-GMP [16]. While cellulose production through AdrA appears to be a very specific response to a specific c-di-GMP signalling pathway, a recent study challenges the role of some diguanylate cyclases in modulating cytoplasmic c-di-GMP pools in *S. Typhimurium* [72]. There is evidence that a high concentration of c-di-GMP can regulate expression of *soxS* (ROS defence), *fur* (iron acquisition), and other global regulatory proteins in *E. coli* [73], however the physiological relevance of this study is questionable. In recent experiments performed with *P. aeruginosa*, Starkey et al. [74] found that the number of genes regulated in response of c-di-GMP was relatively small compared to the number of genes differentially regulated as a result of aggregation.

The elaborate temporal program associated with the *Salmonella* rdar morphotype is initiated through the aggregation regulator CsgD. The demands for exopolysaccharide production in turn cause changes in the expression of metabolic genes associated with gluconeogenesis. Finally the microenvironment that results from being embedded in a self-produced matrix results in the induction of numerous pathways associated with stress tolerance. Thus what appears to be a defined temporal program is not coordinated through

a master regulatory pathway but is the result of the cell producing and responding to its own matrix (Fig. 6). Since growth in multicellular aggregates and biofilms is common among microorganisms, our findings may represent a general phenomenon that helps to explain some of the inherent resistant properties of biofilms.

## Materials and Methods

### Bacterial strains, media and growth conditions

*S. Typhimurium* strain ATCC 14028 was used as the wild-type strain in this study. The isogenic *csgD* mutant strain ( $\Delta csgD$ ), previously named  $\Delta agfD$  [9], has a 612 bp deletion in *csgD* (encoding amino acids 6 to 210 in the mature protein). Strains were grown for 16–20 h at 37°C with agitation in Miller's Luria-Bertani broth (1.0% salt) or LB without salt (LBns), supplemented with 50 µg/ml Kanamycin (Kan), if necessary, before performing additional experiments. To obtain colonies, 1 µl aliquots of overnight cultures were spotted on T agar (1% tryptone, 1.5% Difco agar) and incubated at 28°C for up to 5 days. For bioluminescence assays, reporter strain cultures were diluted 1 in 600 in T broth supplemented with 50 µg/ml Kan to a final volume of 150 µl in 96-well clear-bottom black plates (9520 Costar; Corning Inc.). The culture in each well was overlaid with 50 µl mineral oil prior to starting the assays. Cultures were assayed for luminescence (0.1s) and absorbance (620 nm, 0.1s) every 30 min during growth at 28°C with agitation in a Wallac Victor<sup>2</sup> (Perkin-Elmer Life Sciences, Boston, Mass.).

### Construction of luciferase reporters

Promoter-containing DNA regions were PCR amplified from wild-type *S. Typhimurium*, purified (Qiagen Inc.), digested with *XhoI* and *BamHI* (Invitrogen Canada Inc.), and ligated using T4 DNA ligase (Invitrogen Canada Inc.) into pCS26-Pac (*XhoI*-*BamHI*) or pU220 (*BamHI*-*XhoI*) reporter vectors containing the *luxCDABE* operon from *Photobacterium luminescens* [75]. All primers used for reporter construction are listed in Table S2. *Salmonella*

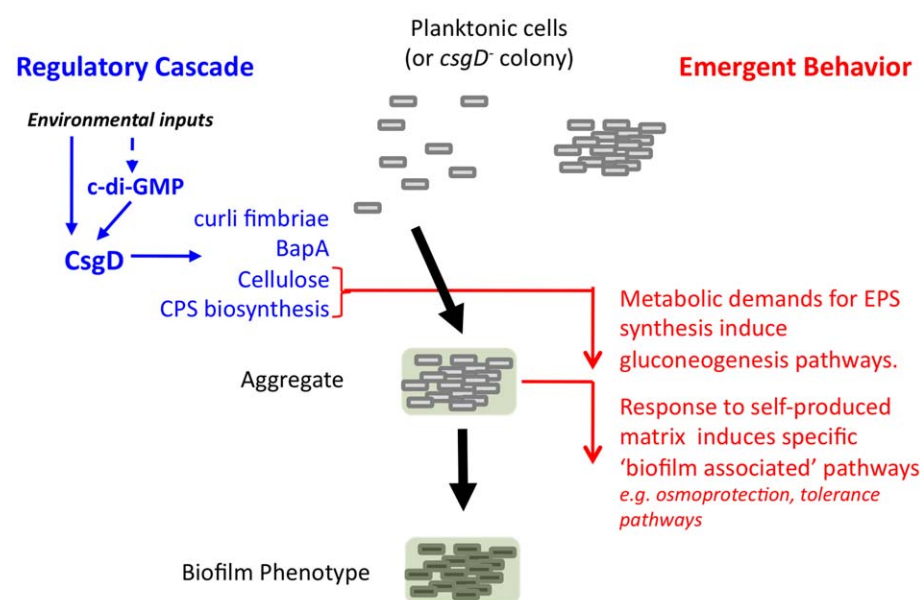

**Figure 6. Model of biofilm development dependent on cellular response to self-produced extracellular matrix.** Aggregation is initiated by the activation of the CsgD regulon; BapA is a large cell-surface protein involved in biofilm formation [84]. The metabolic demand of polysaccharide production leads to induction of gluconeogenesis and the subsequent response to the self-produced matrix activates pathways that lead to general biofilm phenotypes. These later processes represent emergent behaviors and are not under control of a “biofilm specific” regulatory cascade. doi:10.1371/journal.pone.0011814.g006

strains were transformed with plasmids via electroporation (Bio-Rad Laboratories Inc.).

The *csgDEFG* (*agfDEFG*), *csgBAC* (*agfBAC*), *adrA* and *mbrA* reporters have been previously described [9,22]. The promoter sequences in the sig38H4 [9] and sig70\_7 [38] reporters are (ATAATTCCATGCGGTTTCGCTAAAATCATGTATACCTT-ATTATCAATT) and (AATAATTCCTTGATATTTATGCTTCCGGCTCGTATTTTACGTGCAATT), respectively; the -35 and -10 promoter regions are underlined. These reporters were selected from a library constructed with the above sequences with four degenerate positions in each promoter (K. Pabbaraju and M.G. Surette, unpublished). Light production as the result of transcription from these synthetic promoters reflects  $\sigma^S$ - or  $\sigma^{70}$ -RNA polymerase activity.

### Construction and characterization of *S. Typhimurium* deletion mutants

$\Delta ppsA$  and  $\Delta pckA$  mutant strains were created by deletion mutagenesis of wild-type *S. Typhimurium* using a chloramphenicol cassette as described [76]. Chromosomal loci of the generated mutants were verified by PCR using a primer specific to the insert and a primer that annealed to sequence that flanked the disrupted loci (Table S2). To ensure the absence of secondary mutations, all generated deletions were moved into a clean wild-type background by P22 transduction [77]. The *pckA::cat* mutant was cured of the chloramphenicol cassette as previously described [76]. The unmarked  $\Delta pckA$  mutant was transduced with the P22 lysate of *ppsA::cat* to generate a  $\Delta pckA/\Delta ppsA$  double mutant. The mutants were phenotypically tested by examining their capacity to grow in M9 minimal media supplemented with 0.2% glucose, 0.2% glycerol, 0.4% acetate, 0.4% citrate, or 0.4% succinate as previously described [78].

### Staining of colonies for glycogen production

An aqueous iodine solution (0.01 M I<sub>2</sub>, 0.03 M KI) [79] was initially tested for glycogen staining but did not stain glycogen intensely enough. Therefore, the iodine concentration was increased to 0.1 M and the solution was vortexed for 5 min prior to staining. 5 mL of solution was added to each plate and swirled around the entire plate area and left to stain for 5 min before taking pictures.

### Extraction of metabolites from *S. Typhimurium* colonies

Wild-type or *csgD* mutant colonies were removed from T agar after 2 or 5 days growth and placed into 2 mL sterile vials containing 0.2 g of 0.1 mm Zirconia/Silica beads (BioSpec Products Inc., Bartlesville, OK, USA); two colonies were added to each vial. Immediately following the addition of 1 mL of ice-cold methanol, cells were homogenized for 2 min using a Mini-Beadbeater 8 (BioSpec Products Inc., Bartlesville, OK, USA). Beads and cell debris were sedimented by centrifugation (20,000g, 2 min), the supernatant was removed and filtered through a 0.22  $\mu$  Spin-X centrifuge tube filter (Costar, Corning Inc) by centrifugation (20,000g, 1 min). Samples were evaporated to dryness using a Centrивap concentrator (Labconco Corp., Kansas City, MO) and were stored at -80°C prior to NMR or GC-MS analysis. We chose to extract metabolites using ice-cold methanol because this method yielded the most comprehensive array of metabolites in *E. coli* when six commonly used procedures were compared [80]. To determine the number of colony forming units (CFU) at the time of extraction, colonies removed from agar were resuspended in 0.5 mL of phosphate-buffered saline, homogenized in a tissue grinder for ~20 s, serially diluted in triplicate, plated in duplicate in 5  $\mu$ L drops onto LB agar and incubated at 28°C overnight.

### Preparation of samples for <sup>1</sup>H NMR analysis

Dried samples were resuspended in 600  $\mu$ L of deionized water and filtered through pre-wetted NanoSep 3K filters (Pall, Ann Arbor, MI, USA) by centrifugation (20,000g, 60min) to remove any dissolved proteins. 130  $\mu$ L of metabolite sample buffer (0.5 M sodium phosphate (monobasic)+2.5 mM 2,2-dimethyl-2-silapentane-5-sulfonate (DSS)) and 10  $\mu$ L of 1M sodium azide was added to bring the volume of each sample to ~650  $\mu$ L. pH values ranged between 7.2 and 7.4 for all samples tested (data not shown), therefore samples were not pH-adjusted prior to analysis.

### Preparation of samples for GC-MS analysis

For GC-MS, dried samples were resuspended in 60  $\mu$ L of methoxyamine in anhydrous pyridine (20 mg/ml), transferred to a glass vial and incubated overnight at room temperature on a rotary shaker. 60  $\mu$ L of *N*-methyl-*N*-trimethylsilyltrifluoroacetamide (MSTFA) and 6.0  $\mu$ L of chlorotrimethylsilane (TMS-Cl) were added and the reaction was continued for one hour. A 100  $\mu$ L aliquot of the reaction mixture was diluted with 900  $\mu$ L of hexane prior to analysis.

### <sup>1</sup>H NMR analysis

All experiments were performed on a Bruker Advance 600 MHz spectrometer (Bruker Daltonics) operating at 600.22 MHz and equipped with a 5-mm TXI probe at 298 K for solution-state analysis. All one-dimensional <sup>1</sup>H NMR spectra were acquired using a standard Bruker noesypr1d pulse sequence in which the residual water peak was irradiated during the relaxation delay of 1.0 s and during the mixing time of 100 ms. A total of 256 scans were collected into 65,536 data points over a spectral width of 12,195 Hz, with a 5-s repetition time. A line broadening of 0.5 Hz was applied to the spectra prior to Fourier transformation, phasing and baseline correction. To confirm spectral assignments, a <sup>1</sup>H,<sup>13</sup>C heteronuclear single quantum correlation (HSQC) and a <sup>1</sup>H,<sup>1</sup>H total correlation (TOCSY) spectra were acquired. A standard echo/antiecho-TPPI gradient selection pulse sequence [81] was used for HSQC spectrum. The parameters comprised a J-coupling delay of 0.86 ms, time domain points of 2 k (F2) and 256 (F1), spectral width (<sup>1</sup>H) of 12 ppm, spectral width (<sup>13</sup>C) of 169 ppm, GARP <sup>13</sup>C decoupling, 80 scans/increment, acquisition time of 0.14 s, and a relaxation delay of 1.6 s. A phase sensitive homonuclear Hartman-Hahn transfer using DIPSI2 sequence for mixing with water suppression using excitation sculpting with gradients [82] was used for TOCSY spectrum with parameters comprised a TOCSY mixing time 0.12 s, time domain points of 2k (F2) and 400 (F1), spectral width (both <sup>1</sup>H) of 12 ppm, 64 scans/increment, acquisition time of 0.14 s, and a relaxation delay of 1.0 s.

Metabolite identification and quantification from one-dimensional <sup>1</sup>H NMR spectra was achieved using the Profiler module of Chenomx NMR Suite version 4.6 (Chenomx, Inc., Edmonton, Canada). Chenomx Profiler is linked to a database of metabolites whose unique NMR spectral signatures are encoded at various spectrophotometer frequencies, including 600 MHz. Two-dimensional <sup>1</sup>H NMR was employed to confirm compound identities where necessary. Metabolites were quantified by comparison to the internal standard DSS, which also served as a chemical shift reference.

### GC-MS analysis

Experiments were performed on an Agilent 5975B inert XL gas chromatograph (6890N) and mass spectrometer (EI/CI) (Agilent Technologies Canada Inc., Mississauga, Ont). Individual metabolites were identified by comparison to the HSALLMASS

compound database using the Agilent MSD Security ChemStation software.

## Chemometric Analysis

One-dimensional  $^1\text{H}$  NMR spectra were imported into Chenomx NMR Suite version 4.6 (Chenomx) for spectral binning. All shifts related to the solvent (i.e., in the range of 4.5–5.0 ppm) and DSS were excluded, and the remaining spectral regions were divided into 0.04-ppm bins. GC-MS spectra were also divided into 0.04-ppm bins. GC-MS spectra were processed as peaks deconvoluted using the Automated Mass Spectral Deconvolution and Identification System (AMDIS, Version 2.64, NIST, US) and subsequently filtered using spectconnect (<http://spectconnect.mit.edu/>; PMID: 17263323). Chemometric analysis was performed using SIMCA-P version 11.5 (Umetrics) with unsupervised PCA (to look for outliers and other anomalous sources of variance) or orthogonal partial least square discriminate analysis (OPLS-DA). Variables were scaled to unit variance to ensure equal contributions to the models.

## Statistical Analysis

Statistical differences in metabolite concentrations or reporter gene expression (maximum CPS values) between the wild-type and *csgD* mutant strains were calculated using Student's paired *t*-Tests, with a two-tailed distribution.

## Supporting Information

**Table S1** Comparison of promoter-luciferase reporter expression in wild-type *S. Typhimurium* and *csgD* deletion mutant strains.

## References

- Stoodley P, Sauer K, Davies DG, Costerton JW (2002) Biofilms as complex differentiated communities. *Annu Rev Microbiol* 56: 187–209.
- Fux CA, Costerton JW, Stewart PS, Stoodley P (2005) Survival strategies of infectious biofilms. *Trends Microbiol* 13: 34–40.
- Kolter R, Greenberg EP (2006) The superficial life of microbes. *Nature* 441: 300–302.
- Mah TF, Pitts B, Pellock B, Walker GC, Stewart PS, et al. (2003) A genetic basis for *Pseudomonas aeruginosa* biofilm antibiotic resistance. *Nature* 426: 306–310.
- Mulcahy H, Charron-Mazenod L, Lewenza S (2008) Extracellular DNA chelates cations and induces antibiotic resistance in *Pseudomonas aeruginosa* biofilms. *PLoS Pathog* 4: e1000213.
- Sutherland I (2001) Biofilm exopolysaccharides: a strong and sticky framework. *Microbiology* 147: 3–9.
- Collinson SK, Doig PC, Doran JL, Clouthier S, Trust TJ, et al. (1993) Thin, aggregative fimbriae mediate binding of *Salmonella enteritidis* to fibronectin. *J Bacteriol* 175: 12–18.
- Romling U, Sierralta WD, Eriksson K, Normark S (1998) Multicellular and aggregative behaviour of *Salmonella typhimurium* strains is controlled by mutations in the *agfD* promoter. *Mol Microbiol* 28: 249–264.
- White AP, Gibson DL, Kim W, Kay WW, Surette MG (2006) Thin aggregative fimbriae and cellulose enhance long-term survival and persistence of *Salmonella*. *J Bacteriol* 188: 3219–3227.
- Gibson DL, White AP, Snyder SD, Martin S, Heiss C, et al. (2006) *Salmonella* produces an O-antigen capsule regulated by AgfD and important for environmental persistence. *J Bacteriol* 188: 7722–7730.
- Solano C, Garcia B, Valle J, Berañain C, Ghigo JM, et al. (2002) Genetic analysis of *Salmonella enteritidis* biofilm formation: critical role of cellulose. *Mol Microbiol* 43: 793–808.
- Zogaj X, Nitz M, Rohde M, Bokranz W, Romling U (2001) The multicellular morphotypes of *Salmonella typhimurium* and *Escherichia coli* produce cellulose as the second component of the extracellular matrix. *Mol Microbiol* 39: 1452–1463.
- Gerstel U, Romling U (2001) Oxygen tension and nutrient starvation are major signals that regulate *agfD* promoter activity and expression of the multicellular morphotype in *Salmonella typhimurium*. *Environ Microbiol* 3: 638–648.
- Lacour S, Landini P (2004) SigmaS-dependent gene expression at the onset of stationary phase in *Escherichia coli*: function of sigmaS-dependent genes and identification of their promoter sequences. *J Bacteriol* 186: 7186–7195.
- Weber H, Polen T, Heuveling J, Wendisch VF, Hengge R (2005) Genome-wide analysis of the general stress response network in *Escherichia coli*: sigmaS-dependent genes, promoters, and sigma factor selectivity. *J Bacteriol* 187: 1591–1603.
- Kader A, Simm R, Gerstel U, Morr M, Romling U (2006) Hierarchical involvement of various GGDEF domain proteins in rdar morphotype development of *Salmonella enterica* serovar Typhimurium. *Mol Microbiol* 60: 602–616.
- Pesavento C, Becker G, Sommerfeldt N, Possling A, Tschowri N, et al. (2008) Inverse regulatory coordination of motility and curli-mediated adhesion in *Escherichia coli*. *Genes Dev* 22: 2434–2446.
- Simm R, Remminghorst U, Ahmad I, Zakikhany K, Romling U (2009) A role for the EAL-like protein STM1344 in regulation of CsgD expression and motility in *Salmonella enterica* serovar Typhimurium. *J Bacteriol* 191: 3928–3937.
- Anriany YA, Weiner RM, Johnson JA, De Rezende CE, Joseph SW (2001) *Salmonella enterica* serovar Typhimurium DT104 displays a rugose phenotype. *Appl Environ Microbiol* 67: 4048–4056.
- Scher K, Romling U, Yaron S (2005) Effect of heat, acidification, and chlorination on *Salmonella enterica* serovar Typhimurium cells in a biofilm formed at the air-liquid interface. *Appl Environ Microbiol* 71: 1163–1168.
- Apel D, White AP, Grassl GA, Finlay BB, Surette MG (2009) Long-term survival of *Salmonella enterica* serovar Typhimurium reveals an infectious state that is underrepresented on laboratory media containing bile salts. *Appl Environ Microbiol* 75: 4923–4925.
- White AP, Surette MG (2006) Comparative genetics of the rdar morphotype in *Salmonella*. *J Bacteriol* 188: 8395–8406.
- Beloin C, Valle J, Latour-Lambert P, Faure P, Kzreminski M, et al. (2004) Global impact of mature biofilm lifestyle on *Escherichia coli* K-12 gene expression. *Mol Microbiol* 51: 659–674.
- Moorthy S, Watnick PI (2005) Identification of novel stage-specific genetic requirements through whole genome transcription profiling of *Vibrio cholerae* biofilm development. *Mol Microbiol* 57: 1623–1635.
- Whiteley M, Bangera MG, Bumgarner RE, Parsek MR, Teitzel GM, et al. (2001) Gene expression in *Pseudomonas aeruginosa* biofilms. *Nature* 413: 860–864.
- O'Toole GA, Kolter R (1998) Initiation of biofilm formation in *Pseudomonas fluorescens* WCS365 proceeds via multiple, convergent signalling pathways: a genetic analysis. *Mol Microbiol* 28: 449–461.
- Prigent-Combaret C, Vidal O, Dorel C, Lejeune P (1999) Abiotic surface sensing and biofilm-dependent regulation of gene expression in *Escherichia coli*. *J Bacteriol* 181: 5993–6002.

Found at: doi:10.1371/journal.pone.0011814.s001 (0.21 MB DOC)

**Table S2** PCR primers used for reporter construction or mutagenesis.

Found at: doi:10.1371/journal.pone.0011814.s002 (0.21 MB DOC)

## Text S1

Found at: doi:10.1371/journal.pone.0011814.s003 (0.12 MB DOC)

## Acknowledgments

The authors wish to thank Dae-Kyun Ro for use of the Agilent GC-MS system, Wook Kim, Dave Schreimer and members of the Southern Alberta Mass Spectrometry Center for help with proteomic analysis, and Jennifer Happe for sequencing of reporter plasmids from the *S. Typhimurium* random promoter library. We also thank Ken Sanderson, Bill Kay, Shawn Lewenza, Heidi Mulcahy, Eoin O'Grady, Chris Sibley and members of the Surette laboratory for helpful discussions and critical reading of the manuscript.

## Author Contributions

Conceived and designed the experiments: APW MGS. Performed the experiments: APW AW DA PZ RS. Analyzed the data: APW AW DA PZ RS HJV MGS. Contributed reagents/materials/analysis tools: AW HJV. Wrote the paper: APW MGS.

28. Sauer K, Camper AK, Ehrlich GD, Costerton JW, Davies DG (2002) *Pseudomonas aeruginosa* displays multiple phenotypes during development as a biofilm. *J Bacteriol* 184: 1140–1154.
29. Tremoulet F, Duche O, Namane A, Martinie B, Labadie JC (2002) A proteomic study of *Escherichia coli* O157:H7 NCTC 12900 cultivated in biofilm or in planktonic growth mode. *FEMS Microbiol Lett* 215: 7–14.
30. Ghigo JM (2003) Are there biofilm-specific physiological pathways beyond a reasonable doubt? *Res Microbiol* 154: 1–8.
31. Boles BR, Thoendel M, Singh PK (2004) Self-generated diversity produces “insurance effects” in biofilm communities. *Proc Natl Acad Sci USA* 101: 16630–16635.
32. Stewart PS, Franklin MJ (2008) Physiological heterogeneity in biofilms. *Nat Rev Microbiol* 6: 199–210.
33. Lewis K (2007) Persister cells, dormancy and infectious disease. *Nat Rev Microbiol* 5: 48–56.
34. Trygg J, Holmes E, Lundstedt T (2007) Chemometrics in metabolomics. *J Proteome Res* 6: 469–479.
35. Fraenkel DG (1996) Glycolysis. In: Curtiss III R, Ingraham JL, Lin ECC, Low KB, Magasanik B, et al. (1996) *Escherichia coli* and *Salmonella*, Cellular and Molecular Biology. 2nd ed. Washington D.C.: ASM Press. pp 189–198.
36. Lucht JM, Bremer E (1994) Adaptation of *Escherichia coli* to high osmolarity environments: osmoregulation of the high-affinity glycine betaine transport system *proU*. *FEMS Microbiol Rev* 14: 3–20.
37. Underwood AH, Newsholme EA (1965) Some Properties of Fructose 1,6-Diphosphatase of Rat Liver and Their Relation to the Control of Gluconeogenesis. *Biochem J* 95: 767–774.
38. Stocki SL, Annett CB, Sibley CD, McLaws M, Checkley SL, et al. (2007) Persistence of *Salmonella* on egg conveyor belts is dependent on the belt type but not on the rdar morphotype. *Poultry Sci* 86: 2375–2383.
39. Grantcharova N, Peters V, Monteiro C, Zakikhany K, Romling U (2010) Bistable expression of CsgD in biofilm development of *Salmonella enterica* serovar typhimurium. *J Bacteriol* 192: 456–466.
40. White AP, Gibson DL, Grassl GA, Kay WW, Finlay BB, et al. (2008) Aggregation via the red, dry, and rough morphotype is not a virulence adaptation in *Salmonella enterica* serovar Typhimurium. *Infect Immun* 76: 1048–1058.
41. Sauer U, Eikmanns BJ (2005) The PEP-pyruvate-oxaloacetate node as the switch point for carbon flux distribution in bacteria. *FEMS Microbiol Rev* 29: 765–794.
42. Sezonov G, Joseleau-Petit D, D’Ari R (2007) *Escherichia coli* physiology in Luria-Bertani broth. *J Bacteriol* 189: 8746–8749.
43. Chapman AG, Fall L, Atkinson DE (1971) Adenylate energy charge in *Escherichia coli* during growth and starvation. *J Bacteriol* 108: 1072–1086.
44. Gutierrez JA, Csonka LN (1995) Isolation and characterization of adenylate kinase (*adk*) mutations in *Salmonella typhimurium* which block the ability of glycine betaine to function as an osmoprotectant. *J Bacteriol* 177: 390–400.
45. Checroun C, Gutierrez C (2004) Sigma(s)-dependent regulation of *yehZTXW*, which encodes a putative osmoprotectant ABC transporter of *Escherichia coli*. *FEMS Microbiol Lett* 236: 221–226.
46. Carmel-Harel O, Storz G (2000) Roles of the glutathione- and thioredoxin-dependent reduction systems in the *Escherichia coli* and *Saccharomyces cerevisiae* responses to oxidative stress. *Annu Rev Microbiol* 54: 439–461.
47. Bollinger JM, Jr., Kwon DS, Huisman GW, Kolter R, Walsh CT (1995) Glutathionylspermidine metabolism in *Escherichia coli*. Purification, cloning, overproduction, and characterization of a bifunctional glutathionylspermidine synthetase/amidase. *J Biol Chem* 270: 14031–14041.
48. Andrade SL, Patridge EV, Ferry JG, Einsle O (2007) Crystal structure of the NADH:quinone oxidoreductase WrbA from *Escherichia coli*. *J Bacteriol* 189: 9101–9107.
49. Storz G, Imlay JA (1999) Oxidative stress. *Curr Opin Microbiol* 2: 188–194.
50. Shah P, Swiatlo E (2008) A multifaceted role for polyamines in bacterial pathogens. *Mol Microbiol* 68: 4–16.
51. Masse E, Vanderpool CK, Gottesman S (2005) Effect of RyhB small RNA on global iron use in *Escherichia coli*. *J Bacteriol* 187: 6962–6971.
52. Braun V, Hantke K, Koster W (1998) Bacterial iron transport: mechanisms, genetics and regulation. In: Sigel A, Sigel H, eds. *Metal Ions in Biological Systems*. New York: Marcel Dekker, Inc. pp 67–145.
53. Davidson AL, Maloney PC (2007) ABC transporters: how small machines do a big job. *Trends Microbiol* 15: 448–455.
54. Taga ME, Miller ST, Bassler BL (2003) Lsr-mediated transport and processing of AI-2 in *Salmonella typhimurium*. *Mol Microbiol* 50: 1411–1427.
55. Liu M, Durfee T, Cabrera JE, Zhao K, Jin DJ, et al. (2005) Global transcriptional programs reveal a carbon source foraging strategy by *Escherichia coli*. *J Biol Chem* 280: 15921–15927.
56. Matin A, Auger EA, Blum PH, Schultz JE (1989) Genetic basis of starvation survival in nondifferentiating bacteria. *Ann Rev Microbiol* 43: 293–316.
57. Ryder C, Byrd M, Wozniak DJ (2007) Role of polysaccharides in *Pseudomonas aeruginosa* biofilm development. *Curr Opin Microbiol* 10: 644–648.
58. Yildiz FH, Schoolnik GK (1999) *Vibrio cholerae* O1 El Tor: identification of a gene cluster required for the rugose colony type, exopolysaccharide production, chlorine resistance, and biofilm formation. *Proc Natl Acad Sci U S A* 96: 4028–4033.
59. McMeechan A, Lovell MA, Cogan TA, Marston KL, Humphrey TJ, et al. (2005) Glycogen production by different *Salmonella enterica* serotypes: contribution of functional *glgC* to virulence, intestinal colonization and environmental survival. *Microbiology* 151: 3969–3977.
60. Bourassa L, Camilli A (2009) Glycogen contributes to the environmental persistence and transmission of *Vibrio cholerae*. *Mol Microbiol* 72: 124–138.
61. Saier MH, Jr., Ramseier TM (1996) The catabolite repressor/activator (Cra) protein of enteric bacteria. *J Bacteriol* 178: 3411–3417.
62. Potts M (1994) Desiccation tolerance of prokaryotes. *Microbiol Rev* 58: 755–805.
63. Hamilton S, Bongaerts RJ, Mulholland F, Cochrane B, Porter J, et al. (2009) The transcriptional programme of *Salmonella enterica* serovar Typhimurium reveals a key role for tryptophan metabolism in biofilms. *BMC Genomics* 10: 599.
64. Gualdi L, Tagliabue L, Landini P (2007) Biofilm formation-gene expression relay system in *Escherichia coli*: modulation of sigmaS-dependent gene expression by the CsgD regulatory protein via sigmaS protein stabilization. *J Bacteriol* 189: 8034–8043.
65. Gjersing EL, Herberg JL, Horn J, Schaldach CM, Maxwell RS (2007) NMR metabolomics of planktonic and biofilm modes of growth in *Pseudomonas aeruginosa*. *Anal Chem* 79: 8037–8045.
66. Brombacher E, Baratto A, Dorel C, Landini P (2006) Gene expression regulation by the Curli activator CsgD protein: modulation of cellulose biosynthesis and control of negative determinants for microbial adhesion. *J Bacteriol* 188: 2027–2037.
67. Aguilar C, Vlamakis H, Losick R, Kolter R (2007) Thinking about *Bacillus subtilis* as a multicellular organism. *Curr Opin Microbiol* 10: 638–643.
68. Errington J (2003) Regulation of endospore formation in *Bacillus subtilis*. *Nat Rev Microbiol* 1: 117–126.
69. Tagkopoulos I, Liu Y-C, Tavazoie S (2008) Predictive behaviour within microbial genetic networks. *Science* 320: 1313–1317.
70. Hengge R (2009) Principles of c-di-GMP signalling in bacteria. *Nat Rev Microbiol* 7: 263–273.
71. Weber H, Pesavento C, Possling A, Tischendorf G, Hengge R (2006) Cyclic-di-GMP-mediated signalling within the sigma network of *Escherichia coli*. *Mol Microbiol* 62: 1014–1034.
72. Solano C, Garcia B, Latasa C, Toledo-Arana A, Zorraquino V, et al. (2009) Genetic reductionist approach for dissecting individual roles of GGDEF proteins within the c-di-GMP signaling network in *Salmonella*. *Proc Natl Acad Sci U S A* 106: 7997–8002.
73. Mendez-Ortiz MM, Hyodo M, Hayakawa Y, Membrillo-Hernandez J (2006) Genome-wide transcriptional profile of *Escherichia coli* in response to high levels of the second messenger 3',5'-cyclic diguanylic acid. *J Biol Chem* 281: 8090–8099.
74. Starkey M, Hickman JH, Ma L, Zhang N, De Long S, et al. (2009) *Pseudomonas aeruginosa* rugose small-colony variants have adaptations that likely promote persistence in the cystic fibrosis lung. *J Bacteriol* 191: 3492–3503.
75. Bjarnason J, Southward CM, Surette MG (2003) Genomic profiling of iron-responsive genes in *Salmonella enterica* serovar Typhimurium by high-throughput screening of a random promoter library. *J Bacteriol* 185: 4973–4982.
76. Datsenko KA, Wanner BL (2000) One-step inactivation of chromosomal genes in *Escherichia coli* K-12 using PCR products. *Proc Natl Acad Sci U S A* 97: 6640–6645.
77. Maloy SR, Stewart VJ, Taylor RK (1996) Genetic analysis of pathogenic bacteria: a laboratory manual. Plainview NY: Cold Spring Harbor Laboratory Press. pp 466–468.
78. Mercado-Lubo R, Gauger EJ, Leatham MP, Conway T, Cohen PS (2008) A *Salmonella enterica* serovar typhimurium succinate dehydrogenase/fumarate reductase double mutant is avirulent and immunogenic in BALB/c mice. *Infect Immun* 76: 1128–1134.
79. Govons S, Vinopal R, Ingraham J, Preiss J (1969) Isolation of mutants of *Escherichia coli* B altered in their ability to synthesize glycogen. *J Bacteriol* 97: 970–972.
80. Maharjan RP, Ferenci T (2003) Global metabolite analysis: the influence of extraction methodology on metabolome profiles of *Escherichia coli*. *Anal Biochem* 313: 145–154.
81. Schleucher J, Schwendinger M, Sattler M, Schmidt P, Schedletsky O, et al. (1994) A general enhancement scheme in heteronuclear multidimensional NMR employing pulsed field gradients. *J Biomol NMR* 4: 301–306.
82. Hwang TL, Shaka AJ (1995) Water suppression that works. Excitation sculpting using arbitrary waveforms and pulsed field gradients. *J Magn Reson Series A* 112: 275–279.
83. Brown PK, Dozois CM, Nickerson CA, Zuppardo A, Terlonge J, et al. (2001) MlrA, a novel regulator of curli (Agf) and extracellular matrix synthesis by *Escherichia coli* and *Salmonella enterica* serovar Typhimurium. *Mol Microbiol* 41: 349–363.
84. Latasa C, Roux A, Toledo-Arana A, Ghigo J, Gamazo C, et al. (2005) BapA, a large secreted protein required for biofilm formation and host colonization of *Salmonella enterica* serovar Enteritidis. *Mol Microbiol* 58: 1522–1539.
